# Supplementary material for: Formation and phase evolution of calcium phosphates modulated by ion exchange ionomer Nafion
Source: Royal Society of Chemistry journal article supplement (doi:10.1039/d0ce01108h), 2020-01-01
Supplement: d0ce01108h1.pdf [file d0ce01108h1.pdf]

## **Electronic Supplementary Information**

### **Formation and Phase Evolution of Calcium Phosphates Modulated by Ion Exchange Ionomer Nafion**

Shuquan Sun, Qixuan, Chen, and Qijun Song\*

International Research Center for Photoresponsive Molecules and Materials, School of Chemical  
and Material Engineering, Jiangnan University, 1800 Lihu Road, Wuxi, Jiangsu Province  
214122, P.R.China

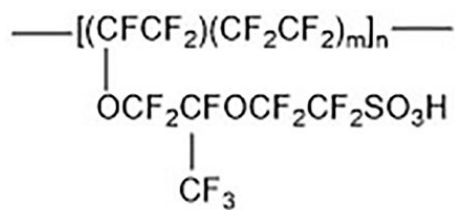

**Figure S1.** The chemical structure of Nafion.

**Table S1.** Preparation conditions of calcium phosphates (CaPs) in the assistance of Nafion.

| Sample        | Nafion<br>(by weight) | [Ca <sup>2+</sup> ]<br>(M) | [PO <sub>4</sub> <sup>3-</sup> ]<br>(M) | pH | Incubating time (h)      |
|---------------|-----------------------|----------------------------|-----------------------------------------|----|--------------------------|
| CaP-1-9-2h    | 0.1 wt%               | 0.1                        | 0.1                                     | 9  | 2                        |
| CaP-2-9-2h    | 0.25 wt%              | 0.1                        | 0.1                                     | 9  | 2                        |
| CaP-3-9-2h    | 0.5 wt%               | 0.1                        | 0.1                                     | 9  | 2                        |
| CaP-0-9-2h    | 0                     | 0.1                        | 0.1                                     | 9  | 2                        |
| CaP-4-9-10min | 0.25 wt%              | 0.1                        | 0.2                                     | 9  | 10min                    |
| CaP-5-9-10min | 0.25 wt%              | 0.15                       | 0.15                                    | 9  | 10min                    |
| CaP-6-9-10min | 0.25 wt%              | 0.2                        | 0.1                                     | 9  | 10min                    |
| CaP-0-5       | 0                     | 0.1                        | 0.1                                     | 5  | Ranged from 10min to 24h |
| CaP-0-9       | 0                     | 0.1                        | 0.1                                     | 9  | Ranged from 10min to 24h |
| CaP-0-12      | 0                     | 0.1                        | 0.1                                     | 12 | Ranged from 10min to 24h |
| CaP-2-5       | 0.25 wt%              | 0.1                        | 0.1                                     | 5  | Ranged from 10min to 24h |
| CaP-2-9       | 0.25 wt%              | 0.1                        | 0.1                                     | 9  | Ranged from 10min to 24h |
| CaP-2-12      | 0.25 wt%              | 0.1                        | 0.1                                     | 12 | Ranged from 10min to 24h |

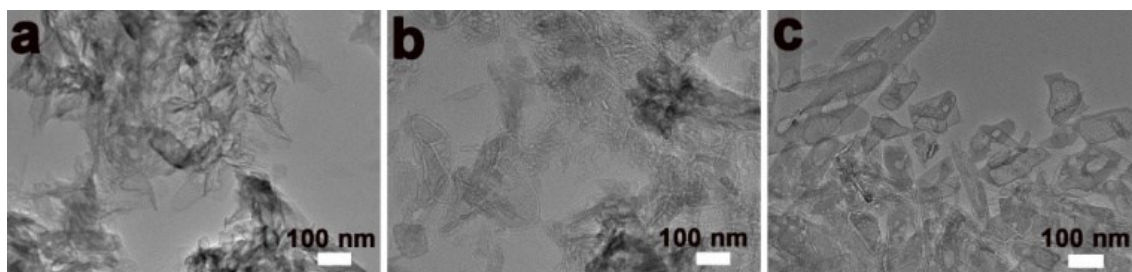

**Fig. S2.** TEM images of the CaPs obtained from the dispersion containing 0.25 wt% Nafion with different initial Ca/P ratio (a) 0.2M/0.1M (CaP-6-9-10min); (b) 0.15M/0.15M (CaP-5-9-10min); (c) 0.1M/0.2M (CaP-4-9-10min). The dispersion mother solution pH is 9 and the incubating time is 10min.

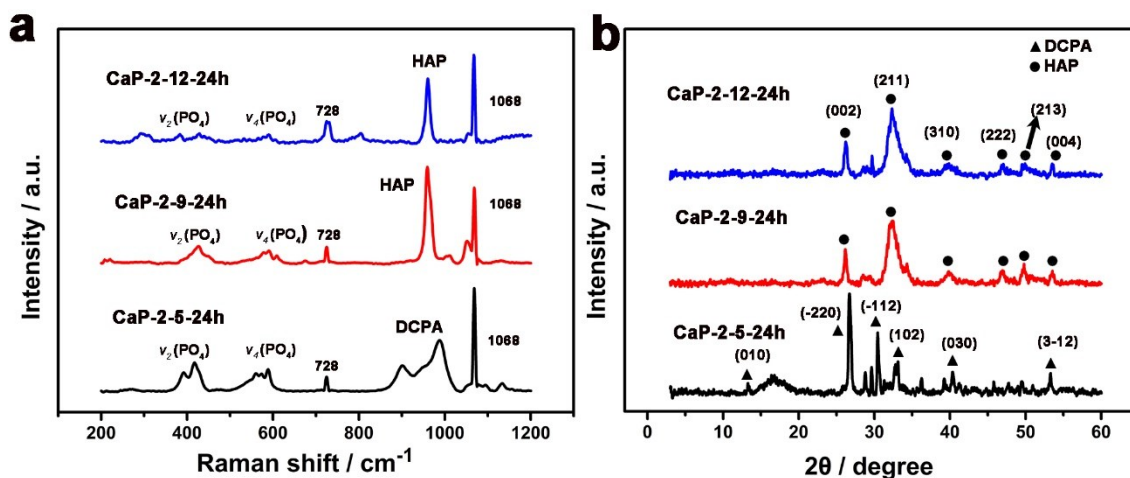

**Fig. S3.** (a) Raman and (b) XRD spectra of formed CaPs in the presence of 0.25 wt% Nafion dispersion with the initial pH ranged from 5 to 12.

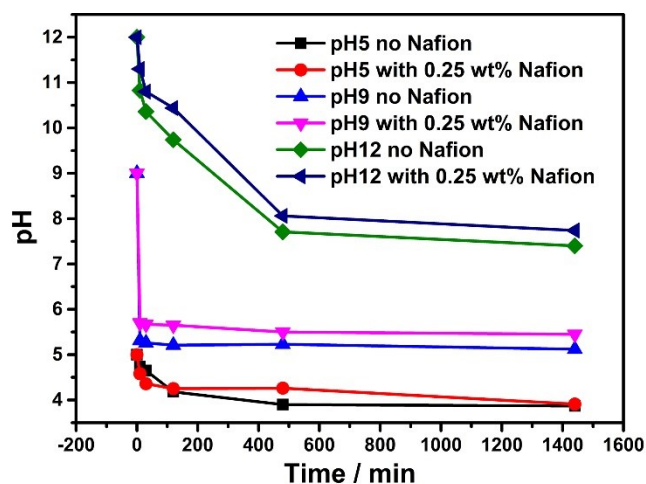

**Fig. S4.** pH shift of the incubating solutions before and after addition of 0.25 wt% Nafion with the initial pH of  $\text{Ca}^{2+}$  and phosphate solution ranged from 5 to 12.
